# Supplementary material
Source: ML conference proceedings conference paper supplement (https://openreview.net/forum?id=VSu5WrtLK3q)
Supplement: supplementary_material [file attachment]

| noise            | measure | none  | weak  | medium | strong |
|------------------|---------|-------|-------|--------|--------|
| Gaussian Noise   | FID     | 0.7   | 41.6  | 76.3   | 218    |
| Gaussian Noise   | IND     | 2.248 | 2.125 | 2.256  | 2.473  |
| Gaussian Blur    | FID     | 0.7   | 13.8  | 73.9   | 229    |
| Gaussian Blur    | IND     | 2.248 | 2.175 | 2.032  | 2.191  |
| Black rectangles | FID     | 0.7   | 123   | 178    | 249    |
| Black rectangles | IND     | 2.248 | 2.276 | 2.544  | 2.387  |
| Swirl            | FID     | 0.7   | 4.8   | 15.4   | 139    |
| Swirl            | IND     | 2.248 | 2.224 | 2.102  | 2.148  |
| Salt & Pepper    | FID     | 0.7   | 371   | 383    | 381    |
| Salt & Pepper    | IND     | 2.248 | 2.988 | 2.196  | 1.903  |
| ImageNet         | FID     | 0.7   | 33.3  | 85.7   | 149    |
| ImageNet         | IND     | 2.248 | 7.148 | 19.55  | 46.4   |
